# Supplementary material for: In situ defect engineering in a multifunctional layer with strong zincophilicity and high Zn-ion conductivity on Zn anodes
Source: Royal Society of Chemistry journal article supplement (doi:10.1039/d3ta05873e), 2023-01-01
Supplement: d3ta05873e1.pdf [file d3ta05873e1.pdf]

## Electronic supplementary information

### In Situ Fabrication of Defect Engineering in Multifunctional Layer with Strong Zincophilicity and High Zn-Ion Conductivity on Zn Anodes

Maoni Lu, ‡<sup>ab</sup> Daochuan Jiang, ‡<sup>a</sup> Xiaoxing Zhou, <sup>ab</sup> Sichen Li, <sup>ab</sup> Xinghao Li, <sup>ab</sup> Ping Chen, <sup>a</sup> Zhenjie Sun, <sup>\*a</sup> Junnan Hao, <sup>\*c</sup> Manzhou Zhu, <sup>ab</sup> and Peng Li<sup>\*ab</sup>

<sup>a</sup> Department of Chemistry and Center for Atomic Engineering of Advanced Materials, School of Materials Science and Engineering, Anhui University, Hefei 230601, P. R. China

<sup>b</sup> Key Laboratory of Structure and Functional Regulation of Hybrid Materials, Ministry of Education, Anhui University, Hefei 230601, P. R. China

<sup>c</sup> School of Chemical Engineering & Advanced Materials, The University of Adelaide, Adelaide, South Australia 5005, Australia

‡ These authors contributed equally to this work.

\* E-mail: [sunzhenjie2008@126.com](mailto:sunzhenjie2008@126.com) (Z. Sun), [junnan.hao@adelaide.edu.au](mailto:junnan.hao@adelaide.edu.au) (J. Hao), [peng-li@ahu.edu.cn](mailto:peng-li@ahu.edu.cn) (P. Li).

## Experiment section

### Materials

ZnSO<sub>4</sub>·7H<sub>2</sub>O (99%), iodine (I<sub>2</sub>, 99.99%) and N-methyl-2-pyrrolidone (NMP, 99.5%) were bought from Aladdin (Shanghai, China). Isopropanol (AR), hydrogen peroxide (H<sub>2</sub>O<sub>2</sub>, 30%) and potassium permanganate (KMnO<sub>4</sub>, AR) were obtained from Sinopharm (Shanghai, China). 2-methylimidazole (98%) was supplied by Macklin. Poly (1,1-difluoroethylene) (PVDF), super P, activated carbon (AC), Zn foil (0.10 mm), Ti foil (0.02 mm) and Cu foil (0.01 mm) were procured from Kejing Star Technology (Shenzhen, China).

### Preparation of Zn@DZ-MOF electrodes

Zn@DZ-MOF anodes were fabricated by a two-step reaction process. First, one side of the Zn foil (0.10 mm) was covered with Kapton tape to protect it from oxidation. Then, the covered Zn foil was sonicated in isopropanol solvent for 30 min and then immersed in 20 mL KMnO<sub>4</sub> solution (0.02 M) at 85 °C for 30 min. Subsequently, the obtained Zn foil was washed and infiltrated into 20 mL 2-methylimidazole solution (0.50 M) for 48 h. The products were washed with deionized water (DI), dried at 50 °C for 24 h and cut into circular disks with a diameter of 12 mm to obtain Zn@DZ-MOF electrodes.

### Preparation of zinc-based metal-organic framework (Zn@Z-MOF) electrodes

Similarly, Zn@Z-MOF anodes were synthesized using the same procedures, except that the treatment of Zn foil in 20 mL KMnO<sub>4</sub> solution (0.02 M) at 85 °C for 30 min was replaced with 20 mL H<sub>2</sub>O<sub>2</sub> solution (30%) at 70 °C for 30 min.

### Preparation of I<sub>2</sub>-AC electrode materials

The I<sub>2</sub>-AC cathode material was prepared by an I<sub>2</sub> sublimation method.<sup>1</sup> In general, 1.0 g of I<sub>2</sub> and 1.0 g of AC were completely mixed, and then placed in a hydrothermal reactor and heated at 90 °C for 4 h. The I<sub>2</sub>-AC composite cathode material was finally obtained after the product cooling to ambient temperature.

### Materials characterization

The samples were characterized by the X-ray diffraction (XRD, Smart Lab, 9 KW) analysis with Cu-Kα

radiation source in the  $2\theta$  range of  $5^{\circ}\sim 90^{\circ}$ . The scanning electron microscopy (SEM, Hitachi, S-4800), transmission electron microscopy (TEM, JEOL JEM-2010) and energy dispersive spectroscopy (EDS, INCA) investigations were employed to study the morphology, microstructure, and element distribution of the materials. The X-ray photoelectron spectroscopy (XPS, Thermo ESCALAB 250) analysis was recorded to characterize the surface composition. The X-ray absorption fine structure (XAFS) measurements of Mn K-edge were conducted on a TableXAFS-500 (Speccreation Instruments Co., Ltd., China). The wettability of the 2.0 M  $\text{ZnSO}_4$  electrolyte to bare Zn, Zn@Z-MOF and Zn@DZ-MOF electrodes were investigated using a contact Angle meter (DSA30). The structural composition of the samples was collected by Fourier transformation infrared (FTIR, Bruker Tensor 27). The  $\text{I}_2$  content in  $\text{I}_2$ -AC was measured by the thermogravimetric analysis (TGA, Hitachi, STA200). The surface morphologies of electrodes during electrochemical deposition were observed by an electron microscope (Shenhong).

### **Electrochemical measurements**

All full and half batteries were assembled into CR-2025 coin cells using a Glass fiber (Whatman GF/D) separator and an electrolyte of 2.0 M  $\text{ZnSO}_4$  aqueous solution (80  $\mu\text{L}$ ). The cathodes were fabricated by mixing  $\text{I}_2$ -AC powder, Super P and poly (1,1-difluoroethylene) (PVDF) in a weight ratio of 8: 1: 1 using N-methyl-2-pyrrolidone (NMP) as blending solvent. Then, the resultant slurry was coated on Ti foils and dried in a vacuum oven at  $60^{\circ}\text{C}$  for 12 h. Galvanostatic Charge-Discharge (GCD) tests were carried out using a Neware Battery Test System (CT-4008T). Electrochemical impedance spectroscopy (EIS), corrosion current density, linear sweep voltammetry (LSV) and chronoamperometry (CA) were measured in a CHI 760E electrochemical workstation. Corrosion current density was tested using a three-electrode system with bare Zn, Zn@Z-MOF or Zn@DZ-MOF electrodes as working electrodes, Zn foil as the counter electrode and Ag/AgCl electrode as the reference electrode. CA was tested in symmetric batteries, LSV was conducted at  $0.5\text{ mV s}^{-1}$  and EIS was performed in a frequency range from 0.01 Hz to 100 kHz. Zn//Cu asymmetric batteries were assembled to measure CE using commercial Cu foil as a cathode and bare Zn, Zn@Z-MOF or Zn@DZ-MOF as anodes, respectively.

### **Density functional theory (DFT) calculation**

All calculations were conducted by using the DFT method within the Vienna Ab initio Simulation Package (VASP).<sup>2</sup> The ion-electron interactions were depicted by implementing the projector augmented wave (PAW) basis at a cutoff energy of 500 eV.<sup>3</sup> In addition, the Perdew-Burke-Ernzerhof

(PBE) functional was employed to handle the exchange and correlation interaction within the generalized gradient approximation (GGA).<sup>4</sup> A vacuum buffer of 15 Å was utilized to prevent the interaction between adjacent images. The convergence criteria of energy and force were set at 10<sup>-6</sup> eV and 0.03 eV Å<sup>-1</sup>, respectively, to guarantee the thorough relaxation of all atomic positions. Empirical DFT-D3 corrections were used to treat long-range van der Waals (vdW) interactions for Z-MOF and DZ-MOF. A supercell containing 4×4 unit cells was adopted to model the Zn (001) surface, and the bottom two layers were fixed. The first Brillouin zone was sampled with k-point meshes of 1 × 1 × 1 and 3 × 3 × 1 for the surface of Z-MOF and Zn (001), respectively. The binding energies of Zn ( $E_b$ ) on each model were defined as follows:

$$E_b = E_{total} - E_{surf} - E_{Zn} \quad (1)$$

where  $E_{total}$ ,  $E_{surf}$  and  $E_{Zn}$  are the energies of the system, the surface and the Zn atom, respectively.

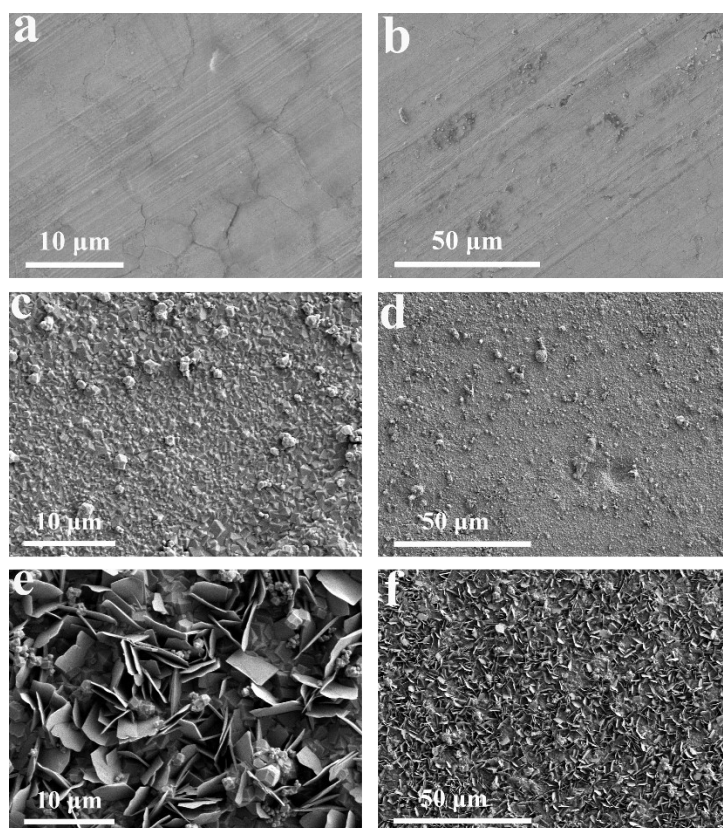

**Fig. S1** SEM images of (a-b) bare Zn, (c-d) Zn@Z-MOF and (e-f) Zn@DZ-MOF electrodes.

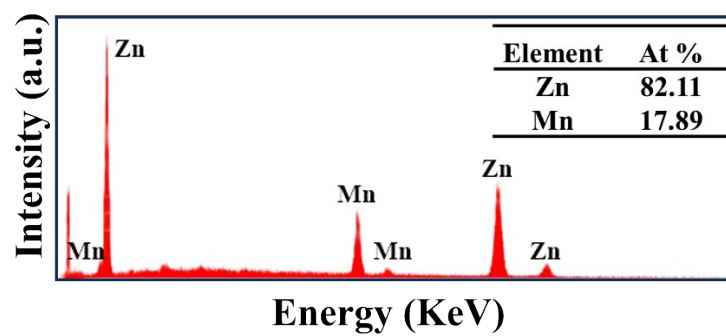

**Fig. S2** EDS spectrum of the Zn@DZ-MOF electrode.

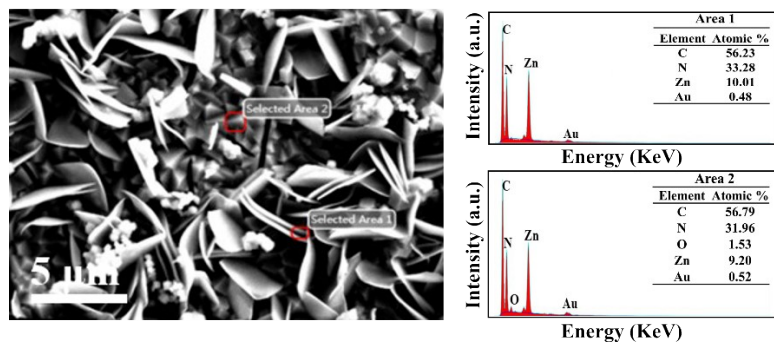

**Fig. S3** SEM image of the Zn@DZ-MOF electrode and the corresponding EDS spectra at different areas.

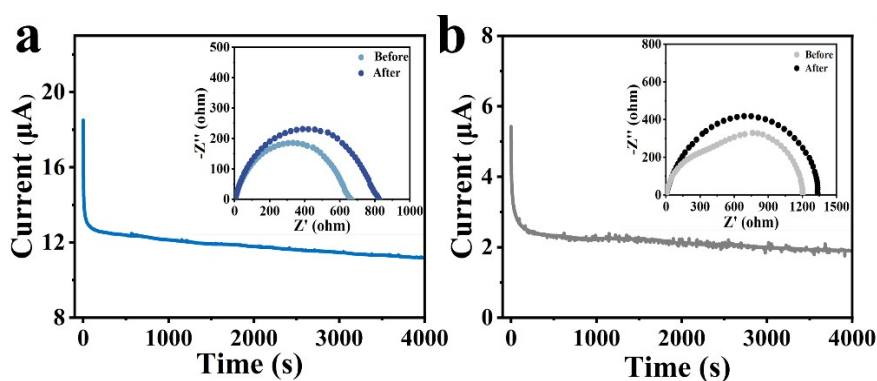

**Fig. S4** Current-time curves of (a) Zn@Z-MOF//Zn@Z-MOF and (b) bare Zn//Zn symmetric batteries with an experimental potential of 20 mV. Inset: the EIS curves of symmetric batteries before and after current-time tests.

The  $\text{Zn}^{2+}$  transference number is calculated according to the Bruce-Vincent formula:

$$t_{\text{Zn}^{2+}} = \frac{I_s(\Delta V - I_0 R_0)}{I_0(\Delta V - I_s R_s)}$$

Where  $\Delta V$  is the applied constant potential (20 mV),  $I_0$  and  $R_0$  are the incipient current and resistance of the symmetric battery, and  $I_s$  and  $R_s$  are the stable current and resistance, respectively.

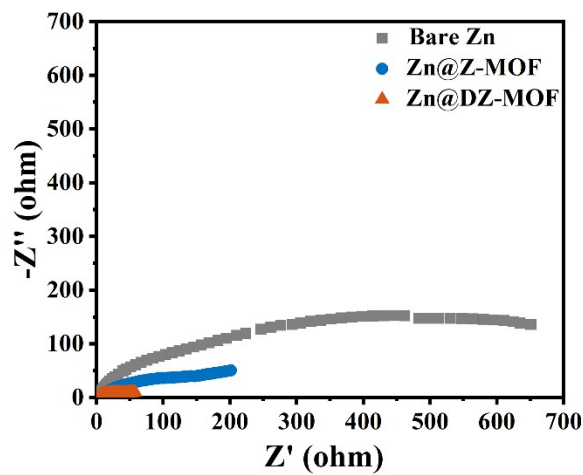

**Fig. S5** EIS spectra of bare Zn//Zn, Zn@Z-MOF//Zn@Z-MOF and Zn@DZ-MOF//Zn@DZ-MOF batteries after 50 cycles.

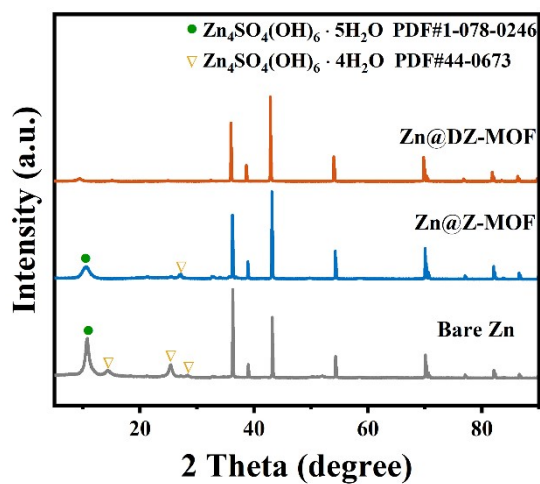

**Fig. S6** XRD patterns of bare Zn, Zn@Z-MOF and Zn@DZ-MOF electrodes after immersing in 2.0 M  $\text{ZnSO}_4$  electrolyte for 7 days.

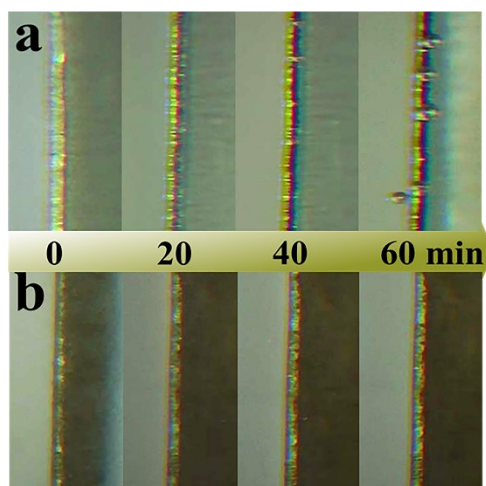

**Fig. S7** In-situ optical microscopic observation of (a) bare Zn and (b) Zn@DZ-MOF electrodes at 1 mA cm<sup>-2</sup>.

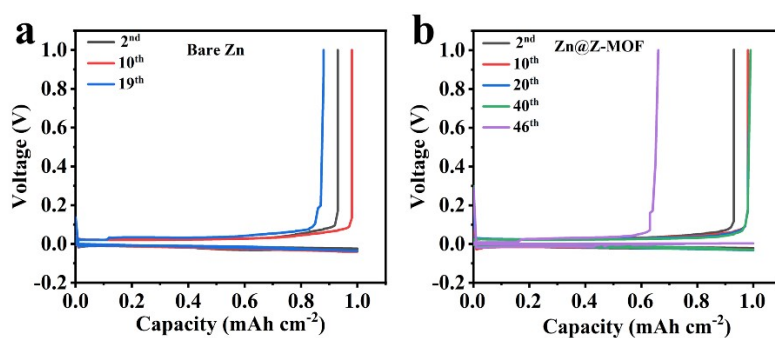

**Fig. S8** Voltage profiles of (a) bare Zn//Cu and (b) Zn@Z-MOF//Cu asymmetric batteries at different cycles.

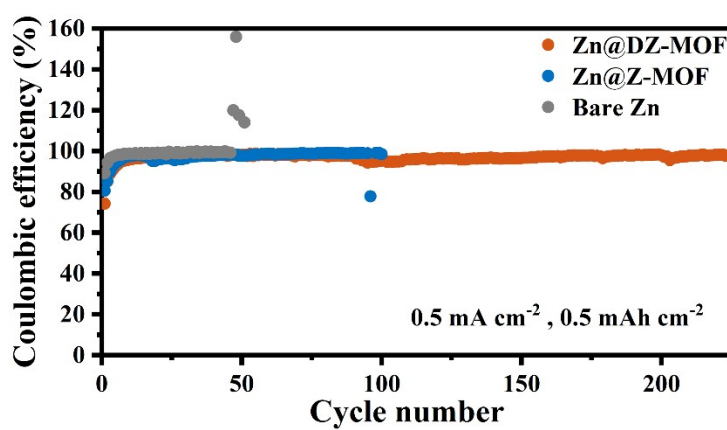

**Fig. S9** Coulombic efficiencies (CEs) of Zn plating/stripping of bare Zn//Cu, Zn@Z-MOF//Cu and Zn@DZ-MOF//Cu batteries at 0.5 mA cm<sup>-2</sup>, 0.5 mAh cm<sup>-2</sup>.

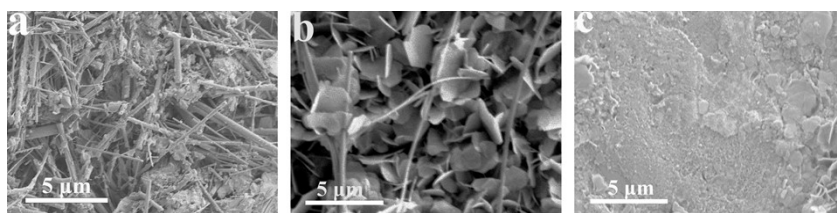

**Fig. S10** SEM images of (a) bare Zn//Zn, (b) Zn@Z-MOF//Zn@Z-MOF and (c) Zn@DZ-MOF//Zn@DZ-MOF symmetric batteries after 100 cycles.

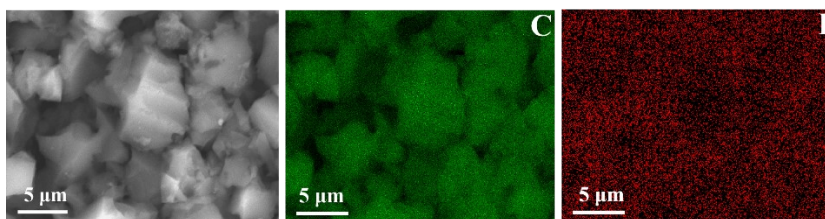

**Fig. S11** SEM image and the corresponding elemental mapping of the as-prepared I<sub>2</sub>-AC composite.

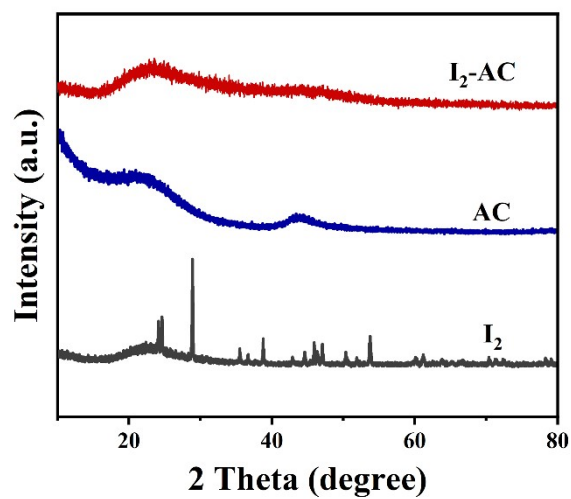

**Fig. S12** XRD patterns of I<sub>2</sub>, AC and I<sub>2</sub>-AC.

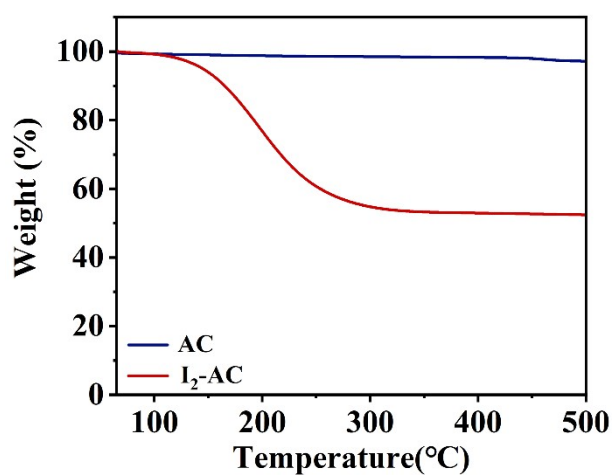

**Fig. S13** TGA curves of AC and  $I_2$ -AC.

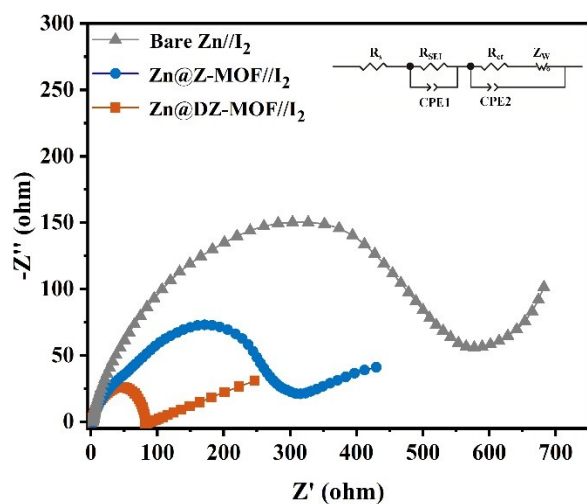

**Fig. S14** The EIS spectra of bare Zn// $I_2$ , Zn@Z-MOF// $I_2$  and Zn@DZ-MOF// $I_2$  batteries. Inset: Equivalent circuit model used for EIS fitting analysis. ( $R_s$ : electrolyte resistance;  $R_{ct}$ : charge transfer resistance;  $R_{SEI}$ : solid electrolyte interphase resistance; CPE: double-layer capacitance;  $Z_w$ : ion diffusion in the host material).

**Table S1** The calculation of transference number of  $\text{Zn}^{2+}$ .

| electrode | $I_0$ ( $\mu\text{A}$ ) | $I_s$ ( $\mu\text{A}$ ) | $R_0$ ( $\Omega$ ) | $R_s$ ( $\Omega$ ) | $\Delta V$ (V) | $t_{\text{Zn}^{2+}}$ |
|-----------|-------------------------|-------------------------|--------------------|--------------------|----------------|----------------------|
| Bare Zn   | 5.43                    | 1.904                   | 1214               | 1324               | 0.02           | 0.269                |
| Zn@Z-MOF  | 18.51                   | 11.26                   | 646.7              | 796.5              | 0.02           | 0.443                |
| Zn@DZ-MOF | 21.3                    | 15.61                   | 389.6              | 519                | 0.02           | 0.721                |

**Table S2** Comparison of the electrochemical performance of the Zn@DZ-MOF anode with recently reported Zn-based anodes.

| Protective layers   | Current density<br>( $\text{mA cm}^{-2}$ ) | Capacity<br>( $\text{mAh cm}^{-2}$ ) | Time (h) | Reference |
|---------------------|--------------------------------------------|--------------------------------------|----------|-----------|
| Zn@ZIF8             | 0.5                                        | 0.2                                  | 500      | 5         |
| Zn@ZIF              | 2                                          | 1                                    | 1200     | 6         |
|                     | 2                                          | 2                                    | 700      |           |
| ZIF-8/Zn            | 2                                          | 2                                    | 800      | 7         |
|                     | 5                                          | 5                                    | 800      |           |
| Zn@ZIF-L            | 0.25                                       | 0.25                                 | 800      | 8         |
| S/MX@ZnS@Zn         | 0.5                                        | 0.5                                  | 1600     | 9         |
|                     | 1                                          | 1                                    | 1100     |           |
| ZPS@Zn              | 1                                          | 1                                    | 2200     | 10        |
|                     | 5                                          | 2.5                                  | 650      |           |
| Zn-ATMP@Zn          | 1                                          | 1                                    | 1850     | 11        |
| ZnO:S@Zn            | 1                                          | 1                                    | 1400     | 12        |
| ZnSe@Zn             | 1                                          | 1                                    | 1530     | 13        |
| ZnS@Zn              | 2                                          | 2                                    | 1100     | 14        |
| $\text{SiO}_2$ @Zn  | 1                                          | 0.5                                  | 1000     | 15        |
| $\text{CeO}_2$ @Zn  | 0.5                                        | 0.25                                 | 1300     | 16        |
| Zn@ZnF <sub>2</sub> | 0.5                                        | 1                                    | 500      | 17        |

|                      |      |       |      |           |
|----------------------|------|-------|------|-----------|
| AZ-Zn                | 1    | 1     | 1800 | 18        |
| ZnF <sub>2</sub> @Zn | 0.5  | 0.5   | 715  | 19        |
| Zn@PAQ               | 1    | 1     | 1750 | 20        |
| ZIF-11               | 1    | 0.5   | 400  | 21        |
| Sn@Zn-IP             | 2    | 1     | 700  | 22        |
| ZCS@Zn               | 2    | 4     | 1200 | 23        |
| ZrO <sub>2</sub> @Zn | 0.25 | 0.125 | 2800 | 24        |
| UIO-66               | 3    | 0.5   | 500  | 25        |
| ZnO@Zn               | 5    | 1.25  | 500  | 26        |
| PA-Zn                | 2    | 1     | 1500 | 27        |
| Zn@DZ-MOF            | 1    | 1     | 2650 | This work |
|                      | 2    | 2     | 1760 | This work |
|                      | 5    | 5     | 580  | This work |

**Table S3** Fitting data of EIS spectra of bare Zn//I<sub>2</sub>, Zn@Z-MOF//I<sub>2</sub> and Zn@DZ-MOF//I<sub>2</sub> batteries.

| Samples   | R <sub>s</sub> (Ω) | R <sub>SEI</sub> (Ω) | R <sub>ct</sub> (Ω) |
|-----------|--------------------|----------------------|---------------------|
| Bare Zn   | 1.712              | 41.8                 | 511.2               |
| Zn@Z-MOF  | 2.745              | 48.59                | 238.8               |
| Zn@DZ-MOF | 1.719              | 17.36                | 62.77               |

## References

- 1 W. Shang, Q. Li, F. Jiang, B. Huang, J. Song, S. Yun, X. Liu, H. Kimura, J. Liu and L. Kang, *Nano-Micro Lett.*, 2022, **14**, 82.
- 2 G. Kresse and J. Furthmüller, *Comput. Mater. Sci.*, 1996, **6**, 15-50.
- 3 G. Kresse and D. Joubert, *Phys. Rev. B*, 1999, **59**, 1758-1775.
- 4 J. P. Perdew, K. Burke and M. Ernzerhof, *Phys. Rev. Lett.*, 1996, **77**, 3865-3868.
- 5 M. Cui, B. Yan, F. Mo, X. Wang, Y. Huang, J. Fan, C. Zhi and H. Li, *Chem. Eng. J.*, 2022, **434**, 13469.
- 6 X. Liu, F. Yang, W. Xu, Y. Zeng, J. He and X. Lu, *Adv. Sci.*, 2020, **7**, 2002173.
- 7 Y. Long, X. Huang, Y. Li, M. Yi, J. Hou, X. Zhou, Q. Hu, Q. Zheng and D. Lin, *J. Colloid Interf. Sci.*, 2022, **614**, 205-213.
- 8 W. He, T. Gu, X. Xu, S. Zuo, J. Shen, J. Liu and M. Zhu, *ACS Appl. Mater. Interfaces*, 2022, **14**, 40031-

40042.

- 9 Y. An, Y. Tian, C. Liu, S. Xiong, J. Feng and Y. Qian, *ACS Nano*, 2021, **15**, 15259-15273.
- 10 Y. Zhang, C. Peng, Y. Zhang, S. Yang, Z. Zeng, X. Zhang, L. Qie, L.-L. Zhang and Z. Wang, *Chem. Eng. J.*, 2022, **448**, 137653.
- 11 Z. Wang, H. Chen, H. Wang, W. Huang, H. Li and F. Pan, *ACS Energy Lett.*, 2022, **7**, 4168-4176.
- 12 D. Zhu, Y. Zheng, Y. Xiong, C. Cui, F. Ren and Y. Liu, *J. Alloys Compd.*, 2022, **918**, 165486.
- 13 X. Yang, C. Li, Z. Sun, S. Yang, Z. Shi, R. Huang, B. Liu, S. Li, Y. Wu, M. Wang, Y. Su, S. Dou and J. Sun, *Adv. Mater.*, 2021, **33**, e2105951.
- 14 W. Guo, Z. Cong, Z. Guo, C. Chang, X. Liang, Y. Liu, W. Hu and X. Pu, *Energy Storage Mater.*, 2020, **30**, 104-112.
- 15 X. Han, H. Leng, Y. Qi, P. Yang, J. Qiu, B. Zheng, J. Wu, S. Li and F. Huo, *Chem. Eng. J.*, 2022, **431**, 133931.
- 16 H. Liu, J. G. Wang, W. Hua, H. Sun, Y. Huan, S. Tian, Z. Hou, J. Yang, C. Wei and F. Kang, *Adv. Sci.*, 2021, **8**, 2102612.
- 17 Y. Yang, C. Liu, Z. Lv, H. Yang, Y. Zhang, M. Ye, L. Chen, J. Zhao and C. C. Li, *Adv. Mater.*, 2021, **33**, 2007388.
- 18 J. Ren, C. Li, P. Li, S. Liu and L. Wang, *Chem. Eng. J.*, 2023, **462**, 142270.
- 19 J. Han, H. Euchner, M. Kuenzel, S. M. Hosseini, A. Groß, A. Varzi and S. Passerini, *ACS Energy Lett.*, 2021, **6**, 3063-3071.
- 20 D. Xie, Z. W. Wang, Z. Y. Gu, W. Y. Diao, F. Y. Tao, C. Liu, H. Z. Sun, X. L. Wu, J. W. Wang and J. P. Zhang, *Adv. Funct. Mater.*, 2022, **32**, 2204066.
- 21 21. M. He, C. Shu, A. Hu, R. Zheng, M. Li, Z. Ran and J. Long, *Energy Storage Mater.*, 2022, **44**, 452-460.
- 22 Q. Cao, Z. Pan, Y. Gao, J. Pu, G. Fu, G. Cheng and C. Guan, *Adv. Funct. Mater.*, 2022, **32**, 2205771.
- 23 Y. Chu, S. Zhang, S. Wu, Z. Hu, G. Cui and J. Luo, *Energy Environ. Sci.*, 2021, **14**, 3609-3620.
- 24 P. Liang, J. Yi, X. Liu, K. Wu, Z. Wang, J. Cui, Y. Liu, Y. Wang, Y. Xia and J. Zhang, *Adv. Funct. Mater.*, 2020, **30**, 1908528.
- 25 M. Liu, L. Yang, H. Liu, A. Amine, Q. Zhao, Y. Song, J. Yang, K. Wang and F. Pan, *ACS Appl. Mater. Interfaces*, 2019, **11**, 32046-32051.
- 26 X. Xie, S. Liang, J. Gao, S. Guo, J. Guo, C. Wang, G. Xu, X. Wu, G. Chen and J. Zhou, *Energy Environ. Sci.*, 2020, **13**, 503-510.
- 27 Y. Zhang, C. Peng, Z. Zeng, X. Zhang, L. Zhang, Y. Ma and Z. Wang, *ACS Appl. Mater. Interfaces*, 2022, **14**, 10419-10427.
